# Supplementary material
Source: PubMed Central journal article supplement (PMC6548670)

# S1

A

shGLS1

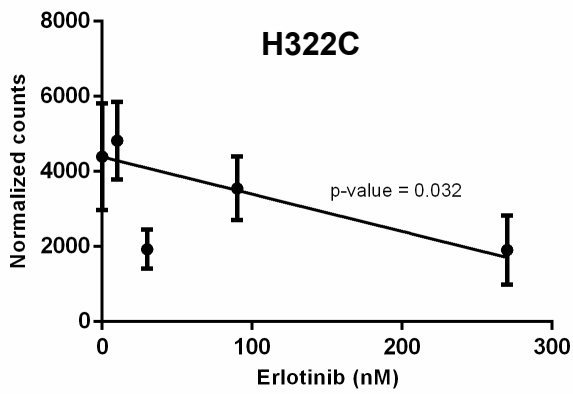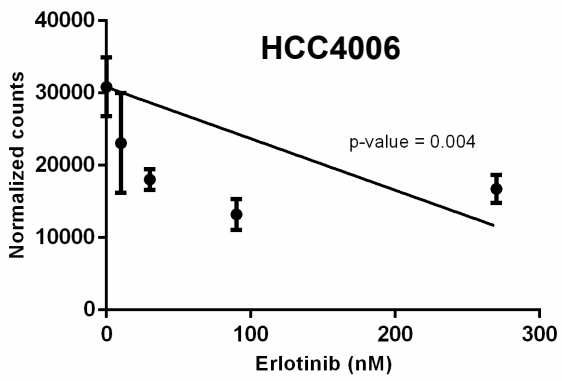

B

shMSMO1

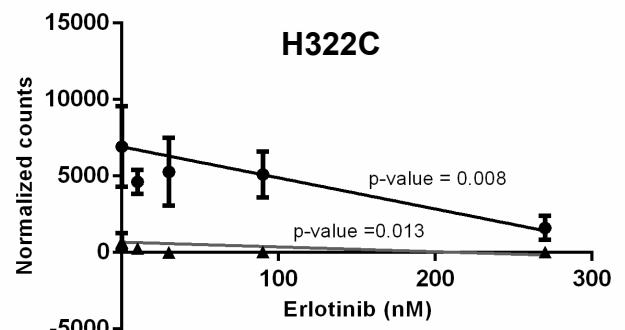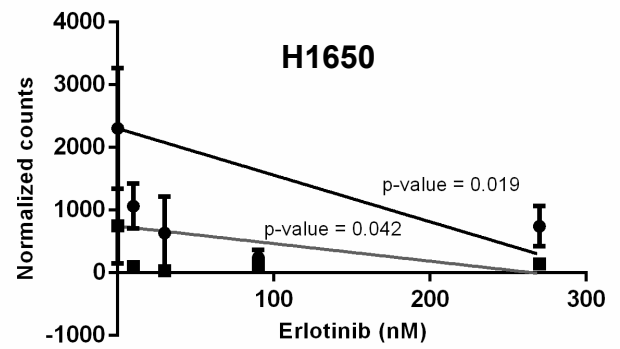

Supplement: NIHMS1522833-supplement-1.pdf [file NIHMS1522833-supplement-1.pdf]

# S2

A

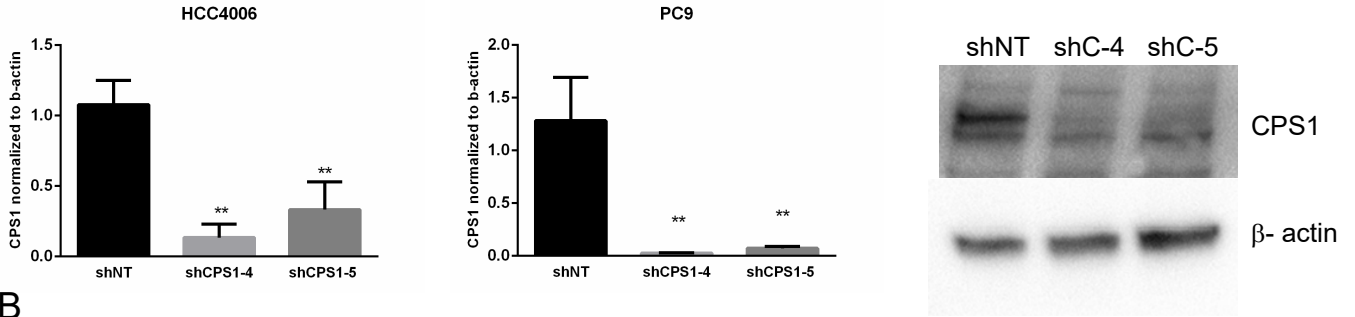

B

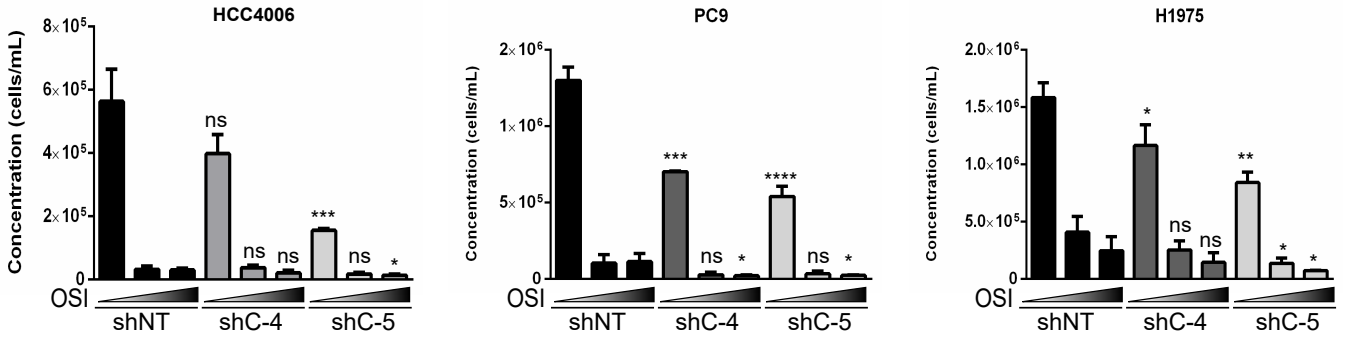

C

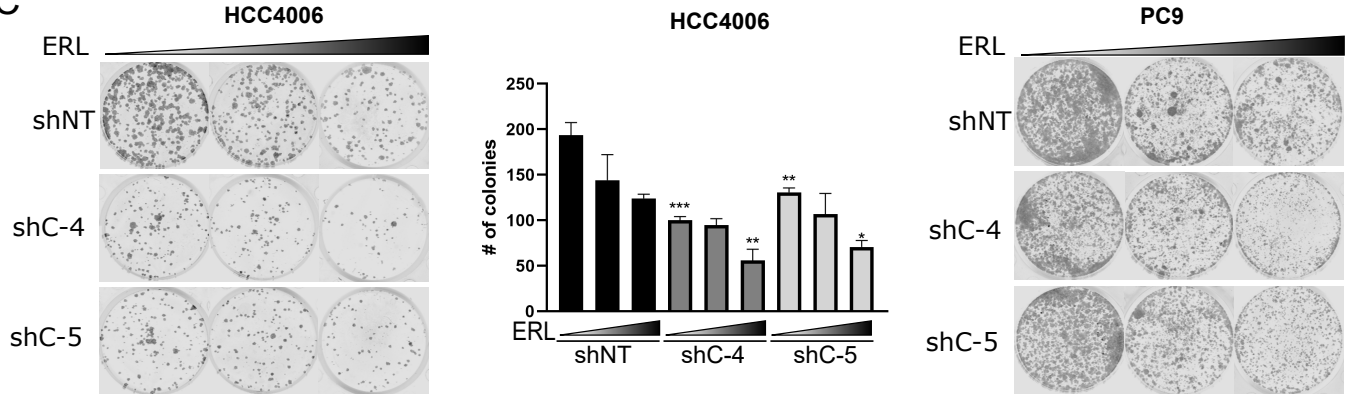

D

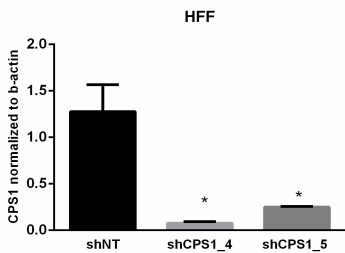

E

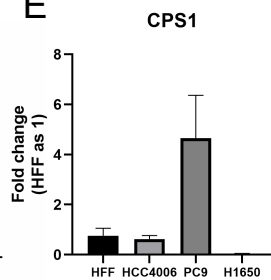

F

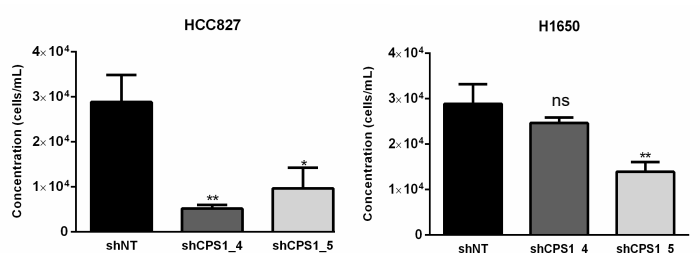

G

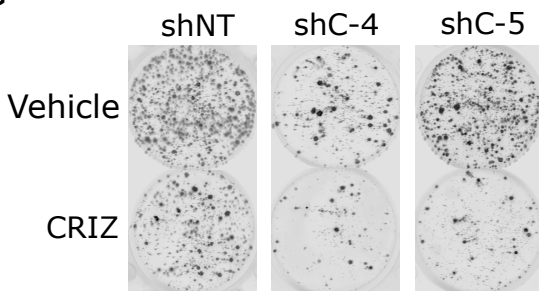

H

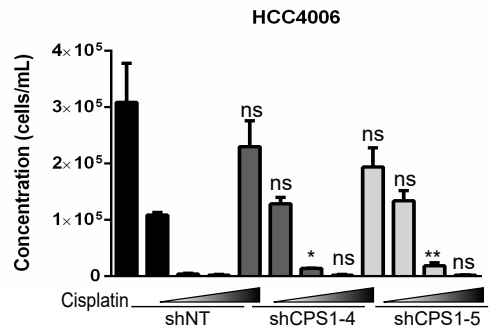

Supplement: NIHMS1522833-supplement-2.pdf [file NIHMS1522833-supplement-2.pdf]

# Figure S3

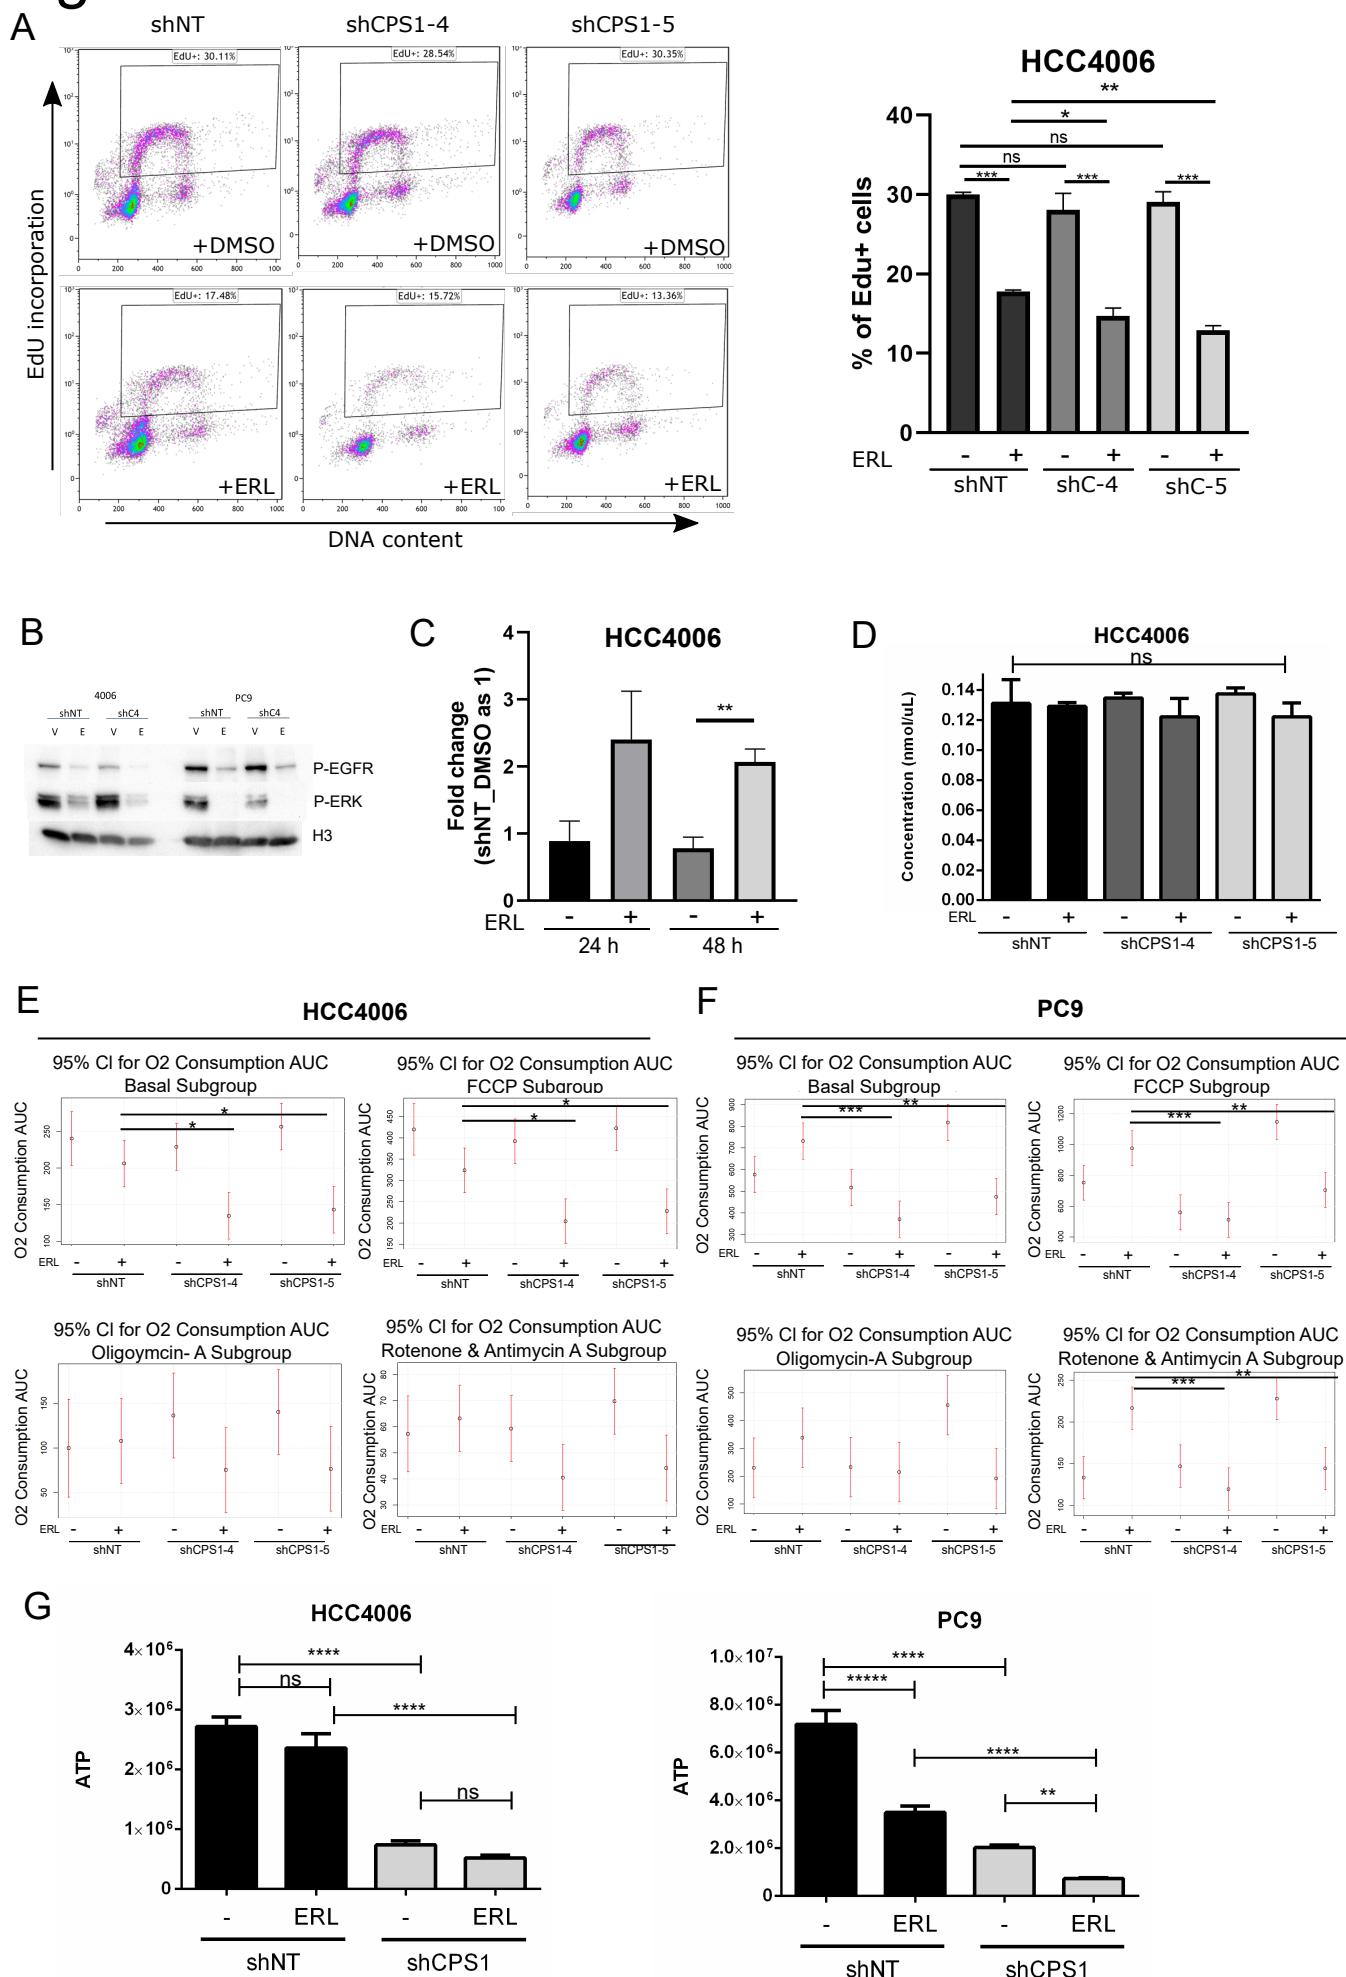

Supplement: NIHMS1522833-supplement-3.pdf [file NIHMS1522833-supplement-3.pdf]

# Figure S5

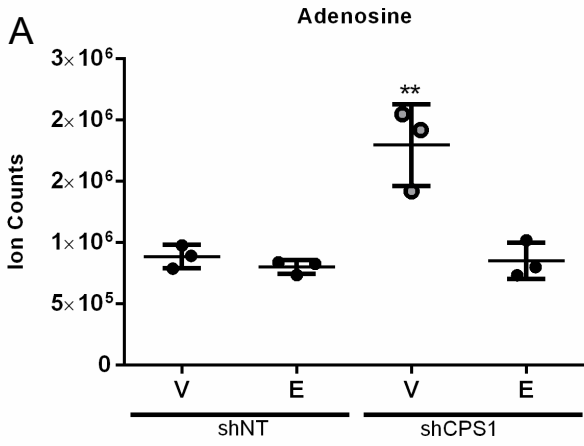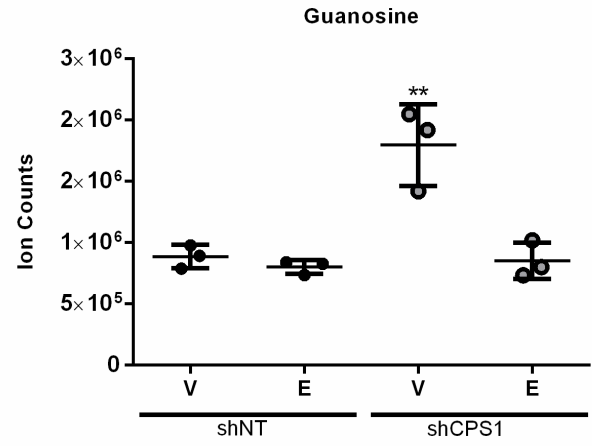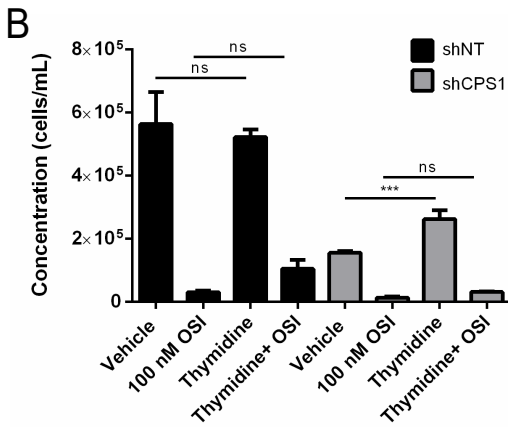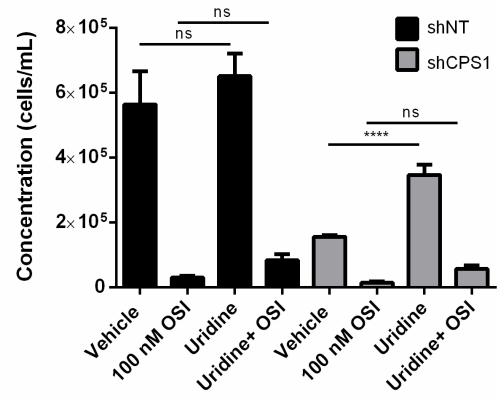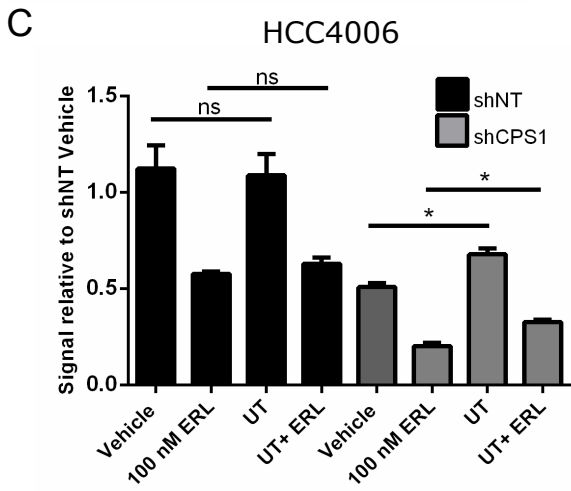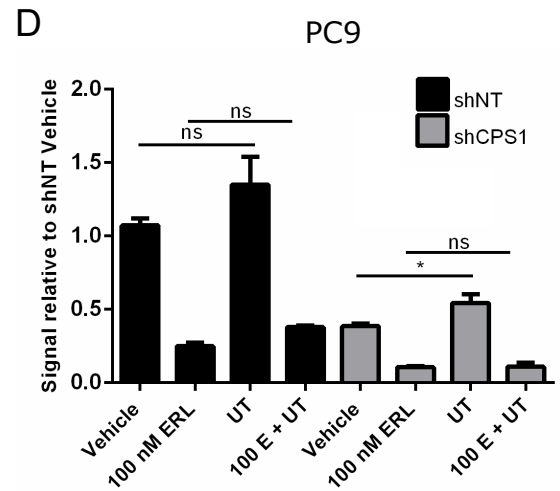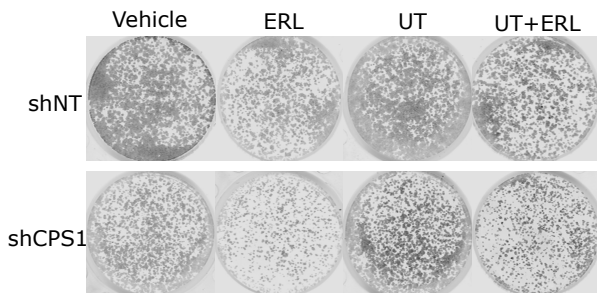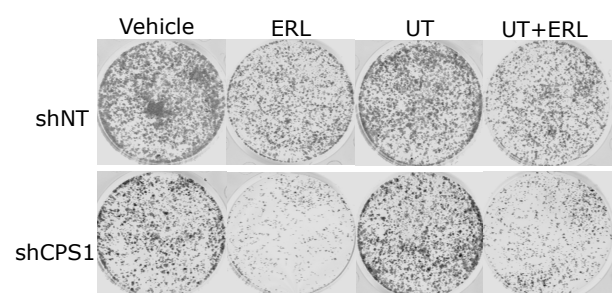

Supplement: NIHMS1522833-supplement-5.pdf [file NIHMS1522833-supplement-5.pdf]

# Figure S6

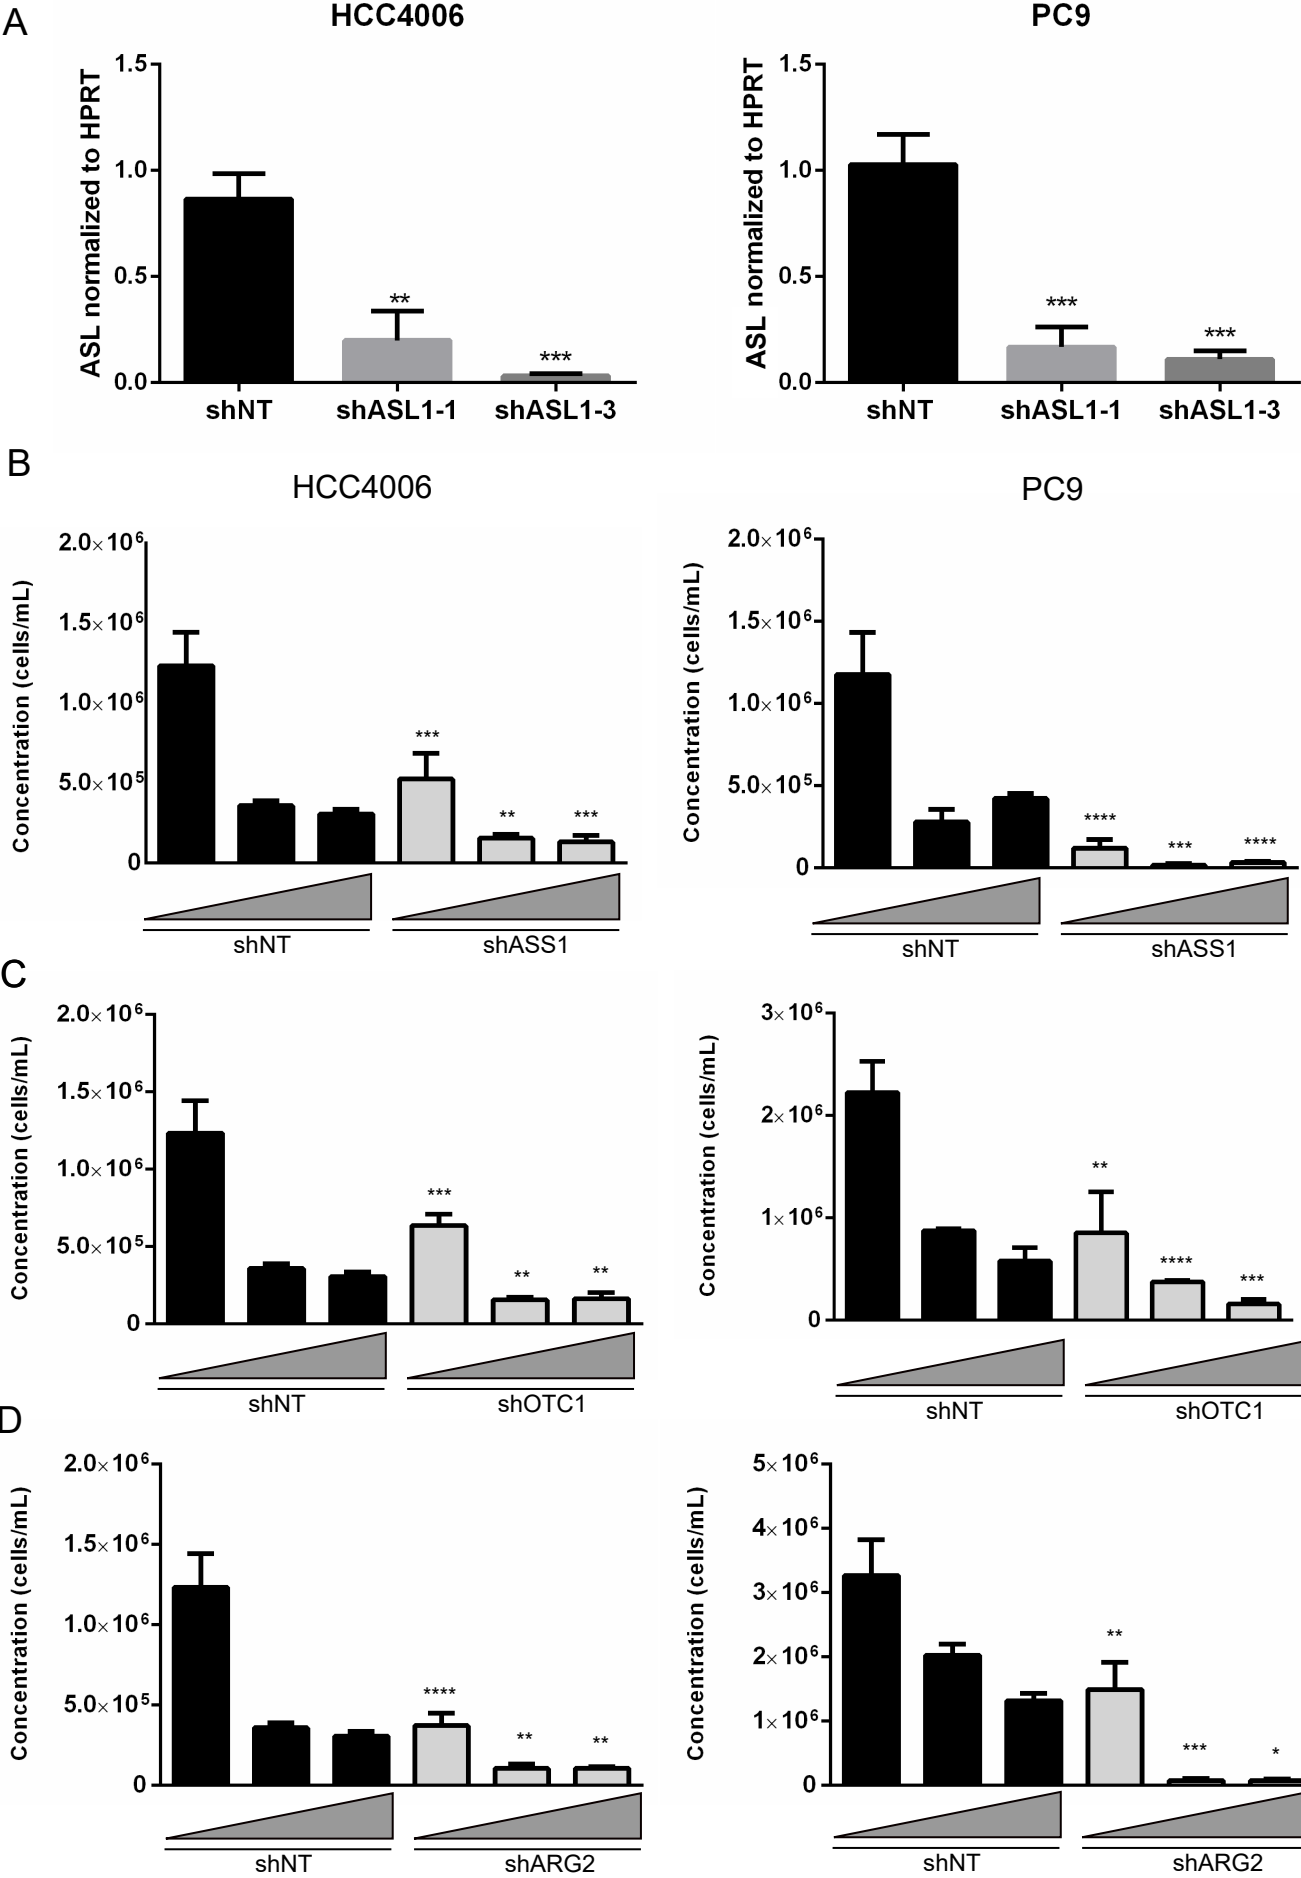

Supplement: NIHMS1522833-supplement-6.pdf [file NIHMS1522833-supplement-6.pdf]
